# Supplementary material for: Copper(ii) complexes with alloferon analogues containing phenylalanine H6F and H12F stability and biological activity lower stabilization of complexes compared to analogues containing tryptophan
Source: Royal Society of Chemistry journal article supplement (doi:10.1039/c9mt00182d), 2019-09-06
Supplement: c9mt00182d1.pdf [file c9mt00182d1.pdf]

## **ELECTRONIC SUPPLEMENTARY MATERIALS**

### **Copper(II) Complexes with Alloferon Analogues Containing Phenylalanine H6F and H12F Stability and Biological Activity**

#### **Lower Stabilization of Complexes Compared to Analogues Containing Tryptophan**

**Teresa Kowalik-Jankowska<sup>a\*</sup>, Monika Lesiów<sup>a</sup>, Katarzyna Krupa<sup>a</sup>, Mariola Kuczer<sup>a</sup>,  
Elżbieta Czarniewska<sup>b</sup>**

*<sup>a</sup> Faculty of Chemistry, University of Wrocław, 14 F. Joliot-Curie Str., 50-383 Wrocław,  
Poland*

*<sup>b</sup> Department of Animal Physiology and Development, Institute of Experimental Biology,  
Adam Mickiewicz University, 89 Umultowska Str., 61-614 Poznań, Poland*

\*corresponding author: [teresa.kowalik-jankowska@chem.uni.wroc.pl](mailto:teresa.kowalik-jankowska@chem.uni.wroc.pl)

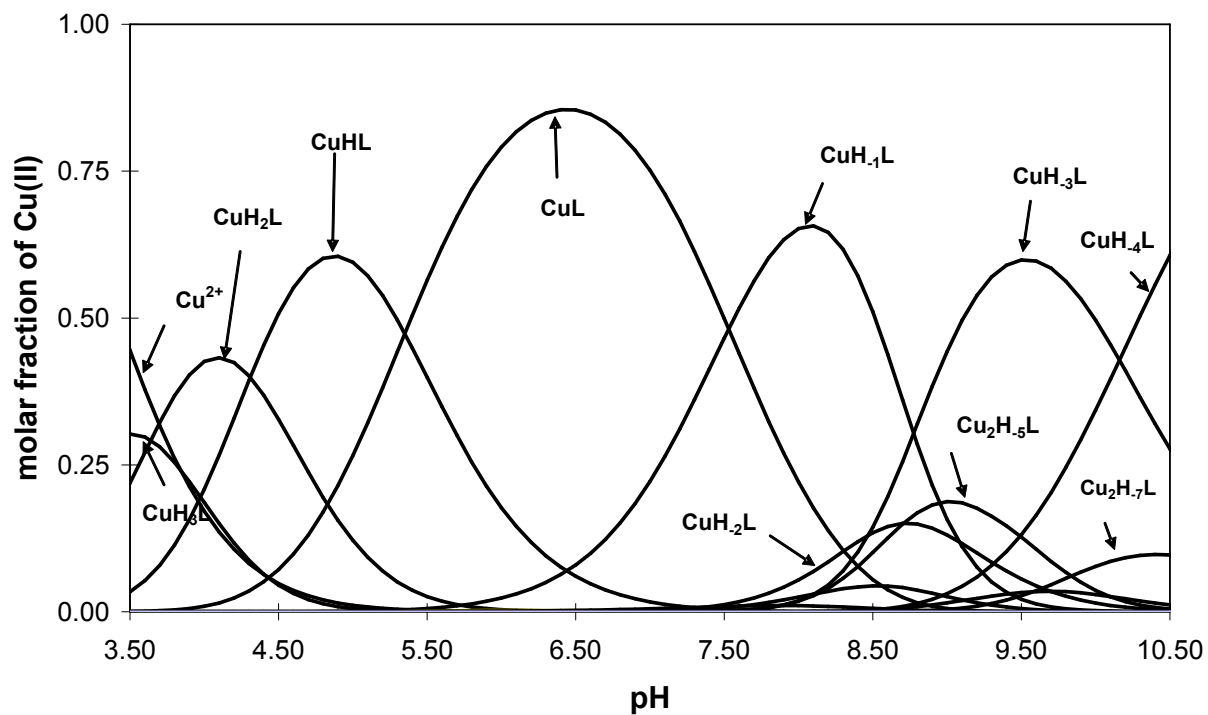

**Figure S1.** Species distribution diagram for Cu(II) complexes with Allo12F. Charges are omitted for clarity.  $[\text{L}] = 0.001 \text{ M}$ , M/L molar ratio = 1:1

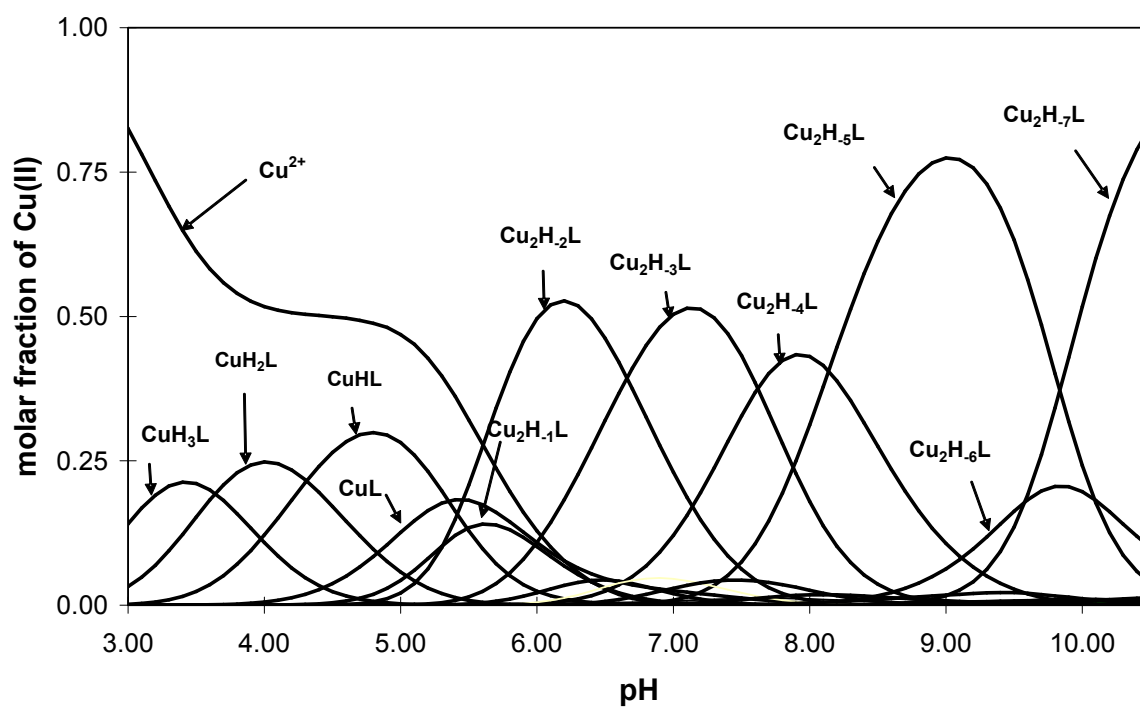

**Figure S2.** Species distribution diagram for Cu(II) complexes with Allo12F. Charges are omitted for clarity.  $[\text{L}] = 0.001 \text{ M}$ , M/L molar ratio = 2:1

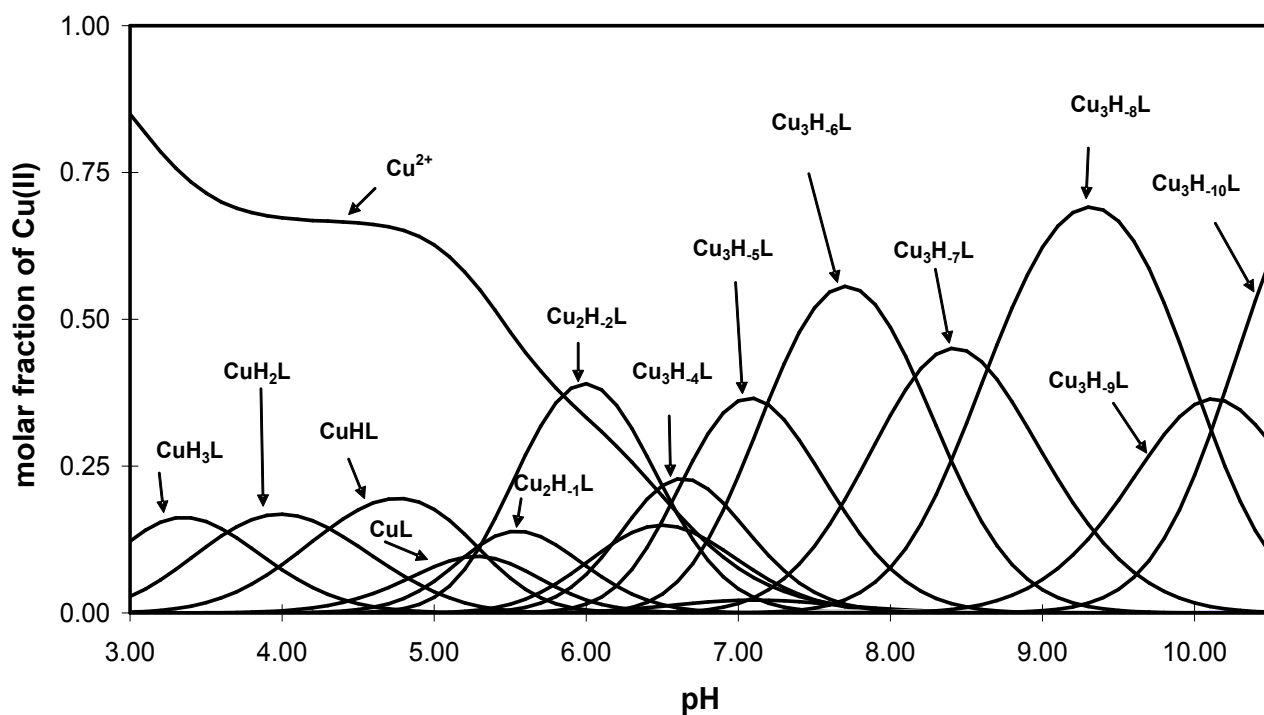

**Figure S3.** Species distribution diagram for Cu(II) complexes with Allo12F. Charges are omitted for clarity.  $[\text{L}] = 0.001 \text{ M}$ , M/L molar ratio = 3:1
